# Supplementary material
Source: Springer Nature journal article supplement (https://www.springermedizin.de/resource/supplementary/12957_2012_1277_MOESM10_ESM.pdf/9562914)

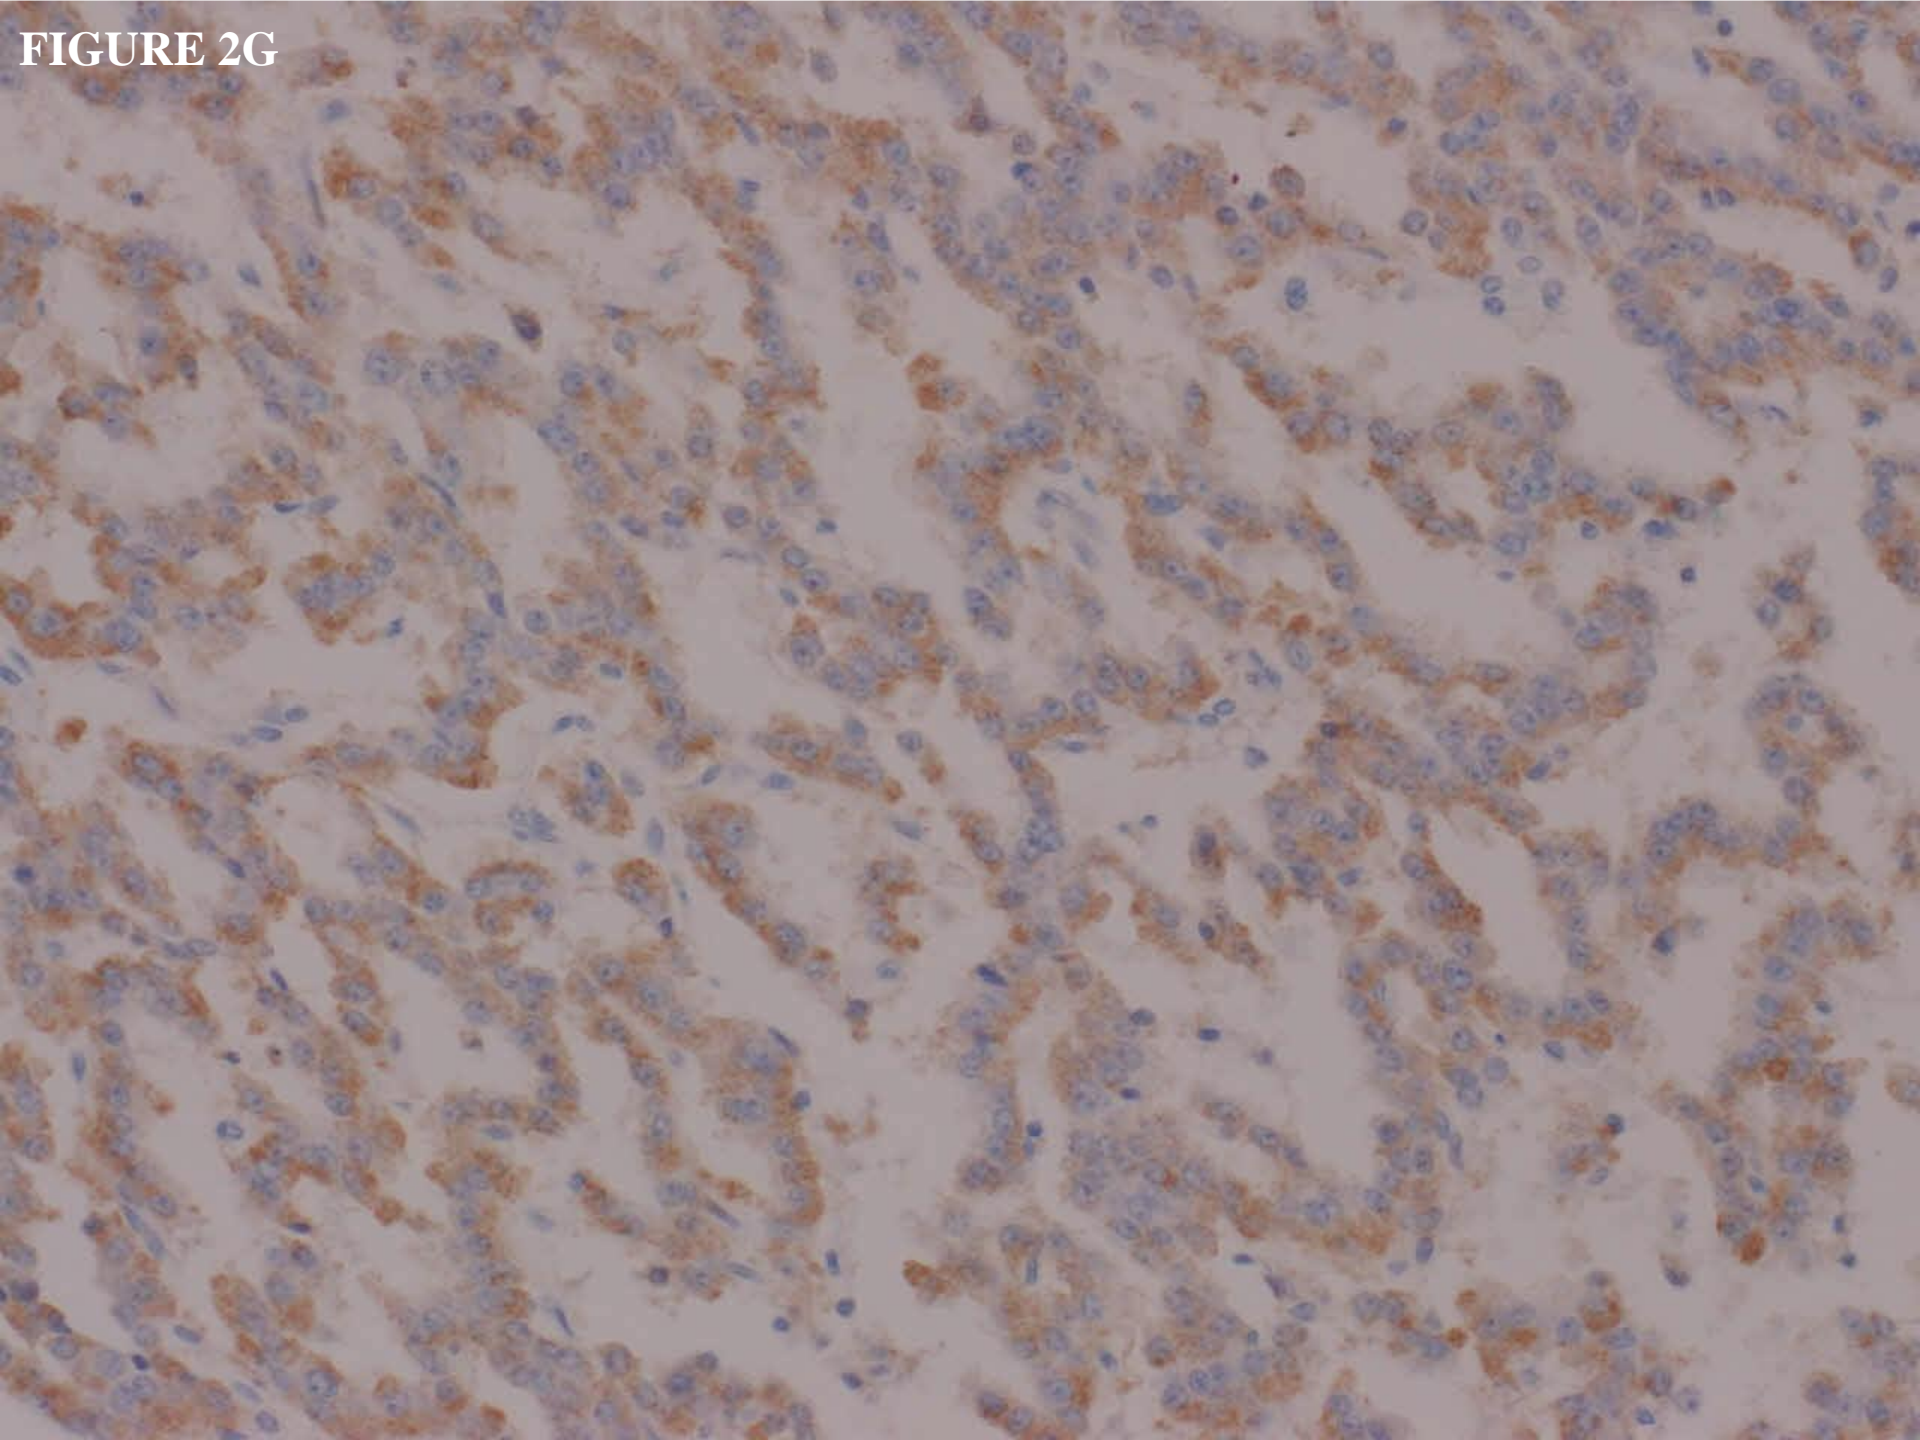

**FIGURE 2G**

Supplement: MOESM10 [file 9562914]
